# Supplementary material
Source: publisher figshare collection journal article supplement (https://gsajournals.figshare.com/ndownloader/files/31182364)
Supplement: Supplementary file 1 [file 31182364]

## Sheet: Lines
CG Number	Gene name	stock number	Lethality suppression
CG15113	5-HT1B	v46485
CG1056	5-HT2A	v102105
CG12073	5-HT7	v104804
CG42283	5PtaseI	v100802
CG4032	Abl	v2897			v: VDRC
CG9210	Ac13E	v11547			BL: Bloomington
CG1506	Ac3	v33217			NIG: Japanese National Institute of Genetics
CG7978	Ac76E	v106232			++: Strong suppression was defined by the observation of six or more pupae/prepupae in a single vial
CG10564	Ac78C	v51978			+: Median suppression was defined by the observation of three to five pupae/prepupae in a single vial
CG14992	Ack	BL27652			+/-: variable suppression across multiple trials (>3)
CG3969	Ack-like	v100169			-: No suppression
CG17174	ACXB	v104248			*: Identified in the primary lethality screen, but not the secondary screen
CG17174	ACXB	v9748
CG5983	ACXC	v105167
CG5712	ACXD	v107396
CG8866	Aduk	v103725
CG11325	AkhR	v9546
CG4006	Akt	BL33615	+
CG4006	Akt	v2902
CG8250	Alk	BL27518
CG8250	Alk	v107083
CG1906	alph	v32476
CG10393	amos	v100511
CG3051	AMPKalpha	BL25931
CG3051	AMPKalpha	v106200
CG3051	AMPKalpha	v1827
CG1028	Antp	v101774
CG10261	aPKC	v105624
CG31469	Argp	v102474
CG12235	Arp10	12235R1
CG12235	Arp10	12235R3
CG12235	Arp10	v104010
CG9901	Arp2	NIG9901R1
CG9901	Arp2	NIG9901R1/R2
CG9901	Arp2	NIG9901R2
CG9901	Arp2	v101999
CG11533	Asator	BL35629
CG11533	Asator	v45120
CG4720	Ask1	v110228
CG4720	Ask1	v34891
CG4720	Ask1	v34892
CG13702	AstC-R2	v106146
CG13702	AstC-R2	v50000
CG30420	Atf-2	v105478
CG1886	ATP7	v8315
CG3068	aurA	v2910
CG1107	aux	v103426
CG5488	B-H2	v11570
CG6386	ball	v108630
CG5055	baz	BL31522
CG5055	baz	BL31523
CG5055	baz	NIG5055R1
CG5055	baz	NIG5055R2
CG4838	beat-Ic	v105066
CG34356	bma	v5199
CG5206	bon	v44284
CG8285	boss	v4366
CG10021	bowl	v102050
CG11491	br	v104648
CG31605	Bsg	v43307
CG5680	bsk	v104569
CG32019	bt	BL31545
CG1479	bt	BL31546
CG1479	bt	v46253
CG8049	Btk29A	v106962
CG14030	Bub1	v101096
CG7838	BubR1	v26109
CG1455	CanA1	v32283
CG14575	CapaR	v13384
CG13412	CASK	v104793
CG33344	CCAP-R	v102995
CG30106	CCHa1-R	v1678
CG32540	CCKLR-17D3	v102039
CG1362	Cdc2rk	BL35325
CG1362	Cdc2rk	v100299
CG12530	Cdc42	NIG12530R2
CG12530	Cdc42	NIG12530R2/R3
CG12530	Cdc42	NIG12530R3
CG12530	Cdc42	UAS-Cdc42DN
CG32742	Cdc7	v104902
CG6027	cdi	v43634
CG10572	Cdk8	v107187
CG5336	Ced-12	NIG5336R2
CG5336	Ced-12	NIG5336R3
CG5336	Ced-12	v107590
CG10089	CG10089	v17991
CG10177	CG10177	v107848
CG10376	CG10376	v35475
CG10417	CG10417	v106180
CG10702	CG10702	BL35289
CG10738	CG10738	BL28580
CG11318	CG11318	v3396
CG11425	CG11425	v8458
CG11426	CG11426	v42599
CG11437	CG11437	v9452
CG11597	CG11597	v38540
CG12069	CG12069	BL27677
CG12069	CG12069	v100886
CG12147	CG12147	v101875
CG1227	CG1227	v105610
CG12290	CG12290	v100939
CG12290	CG12290	v1246
CG12746	CG12746	v33314
CG13067	CG13067	v103334
CG13197	CG13197	v36422
CG13575	CG13575	v9362
CG13579	CG13579	v9366
CG14297	CG14297	v102071
CG15528	CG15528	v14865
CG15556	CG15556	v1791
CG15744	CG15744	v1095
CG15744	CG15744	v4800
CG15744	CG15744	v4801
CG17026	CG17026	v49200
CG17027	CG17027	v50076
CG17028	CG17028	v100100
CG17029	CG17029	v32822
CG17528	CG17528	BL26292
CG17598	CG17598	v32955
CG17698	CG17698	BL35733
CG17698	CG17698	v105884
CG17746	CG17746	v40101
CG17760	CG17760	v107613
CG17760	CG17760	v42255
CG17760	CG17760	v52308
CG1951	CG1951	v33430
CG2577	CG2577	BL33649
CG30054	CG30054	v102887
CG30340	CG30340	v100088
CG31140	CG31140	v101347
CG31183	CG31183	BL28604
CG31183	CG31183	v4773
CG31431	CG31431	BL35248
CG31750	CG31750	v100960
CG32301	CG32301	v12239
CG32305	CG32305	v101103
CG32447	CG32447	v102740
CG32547	CG32547	v101062
CG3277	CG3277	v108052
CG32944	CG32944	v103642
CG33543	CG33543	v32577
CG33639	CG33639	v29644
CG33958	CG33958	BL30507
CG33958	CG33958	v101861
CG33958	CG33958	v106547
CG33958	CG33958	v20107
CG34357	CG34357	v105185
CG34357	CG34357	v107507
CG34357	CG34357	v108231
CG34357	CG34357	v29276
CG34357	CG34357	v31080
CG34384	CG34384	v102481
CG3618	CG3618	v100941
CG3632	CG3632	v26254
CG3829	CG3829	v103492
CG3829	CG3829	v42870
CG3829	CG3829	v42872
CG4041	CG4041	v34780
CG4168	CG4168	v100080
CG42327	CG42327	v100914
CG42366	CG42366	BL35451
CG42366	CG42366	BL36112	*
CG42366	CG42366	v108102
CG42450	CG42450	v105315/CyO
CG4313	CG4313	v107434
CG43373	CG43373	v102057
CG34372	CG43795	v107979
CG31714	CG44153	v102832
CG4839	CG4839	v100999
CG5790	CG5790	v45044
CG6036	CG6036	v21023
CG6800	CG6800	v104255
CG6805	CG6805	v107728
CG7156	CG7156	v26035
CG7236	CG7236	BL27505
CG7378	CG7378	v106098
CG7497	CG7497	v106421
CG8173	CG8173	v105661
CG8485	CG8485	v35940
CG8565	CG8565	v100449
CG8726	CG8726	v40719
CG8878	CG8878	v100985
CG9095	CG9095	v104608
CG9222	CG9222	v104259
CG9389	CG9389	v44663
CG9391	CG9391	v23723
CG9784	CG9784	v108075
CG9962	CG9962	v108721
CG9553	chic	NIG9553R3
CG9553	chic	NIG9553R3/R4	*
CG9553	chic	NIG9553R4	*
CG9553	chic	v102759
CG9553	chic	v16533
CG2125	ci	v105620
CG2028	Ck1a	BL25786	+/-
CG2028	Ck1a	BL35153	+/-
CG2028	Ck1a	BL41711
CG2028	Ck1a	v110768
CG2028	Ck1a	v13664
CG17520	CkIIalpha	BL31645
CG15224	CkIIbeta	v32377
CG8914	CkIIbeta2	v102633
CG8914	CkIIbeta2	v26915
CG17894	cnc	v108127
CG17894	cnc	v37674
CG1621	Coop	v108055
CG17158	cpb	v45668
CG1587	Crk	NIG1587R1	++
CG1587	Crk	NIG1587R2
CG42317	Csk	v102313
CG3954	csw	v21756
CG17678	cta	BL31132
CG2048	dco	BL27719
CG10697	Ddc	UAS-DdcRNAi
CG34361	Dgk	v105753
CG8657	Dgkepsilon	v4659
CG32843	Dh31-R	v101995
CG1768	dia	BL28541
CG1768	dia	BL33424
CG1768	dia	BL35479
CG8667	dimm	v107776
CG6667	dl	v105491
CG1658	Doa	v102520
CG3727	dock	v37524
CG3727	dock	v37525
CG14226	dome	v106071
CG6498	dop	v35100
CG9652	Dop1R1	v107058
CG18741	Dop1R2	v105324
CG18741	Dop1R2	v3391
CG33517	Dop2R	v11470
CG18314	DopEcR	v103494
CG32666	Drak	v107263
CG1760	Drak	v32960
CG6033	drk	BL27563	+
CG6033	drk	BL41692
CG17348	drl	BL29602
CG17348	drl	v100039
CG17348	drl	v3048
CG3915	Drl-2	v40484
CG10016	drm	v102405
CG2086	drpr	v27084
CG2086	drpr	v4830
CG31190	Dscam3	v6685
CG15793	Dsor1	v107276
CG15793	Dsor1	v40026
CG3131	Duox	v2593
CG15013	dyl	v102166
CG15013	dyl	v39022
CG4551	Dyrk2	v101376
CG32346	E(bx)	v46645
CG3525	eas	v103784
CG10579	Eip63E	v106824
CG8127	Eip75B	v108399
CG15112	ena	BL31582
CG1511	Eph	BL28511
CG1511	Eph	BL35290
CG1511	Eph	v27236
CG1511	Eph	v4771
CG1511	Eph	v6545
CG32703	Erk7	v13444
CG3758	esg	v9793
CG3758	esg	v9794
CG2914	Ets21C	v51223
CG6338	Ets97D	v12633
CG8933	exd	v100259
CG6355	fab1	v27591
CG8874	FER	BL33375
CG8874	FER	v107266
CG8874	FER	v36054
CG5952	Fer2	v17849
CG5952	Fer2	v17851
CG10002	fkh	v106644
CG2096	flw	v2964
CG10033	for	v108293
CG7693	fray	v106919
CG18734	Fur2	BL25959
CG12232	Galphaf	v17054
CG12232	Galphaf	v17056
CG10060	Galphai	BL31133
CG10060	Galphai	BL35407
CG10060	Galphai	v28150
CG2204	Galphao	v19124
CG17759	Galphaq	BL33765
CG17759	Galphaq	v105300
CG17759	Galphaq	v19088
CG17759	Galphaq	v50729
CG17759	Galphaq	v51116
CG2835	Galphas	v105485
CG2835	Galphas	v24958
CG2835	Galphas	v24959
CG10278	GATAe	v10418
CG10278	GATAe	v10420
CG10545	Gbeta13F	BL31134
CG10545	Gbeta13F	BL35041
CG10545	Gbeta13F	v100011
CG10545	Gbeta13F	v31257
CG10763	Gbeta5	BL28310
CG10763	Gbeta5	v108261
CG8770	Gbeta76C	v104745
CG8770	Gbeta76C	v28869
CG8770	Gbeta76C	v28870
CG5169	GckIII	5169R3
CG5169	GckIII	BL35339	++
CG5169	GckIII	v107158
CG5169	GckIII	v22024
CG1609	Gcn2	v103976
CG4012	gek	BL35796
CG4012	gek	v107207
CG4012	gek	v28367
CG8261	Ggamma1	BL34372
CG8261	Ggamma1	NIG8261R1
CG8261	Ggamma1	NIG8261R2	*
CG8261	Ggamma1	v28844
CG3694	Ggamma30A	v102706
CG3694	Ggamma30A	v21373
CG6963	gish	v106826
CG6963	gish	v26003
CG7672	gl	v44524
CG40129	Gprk1	BL28354
CG40129	Gprk1	BL35246
CG17998	Gprk2	v101463
CG32664	Gr10a	v39237
CG12622	Gr10b	v31151
CG31662	Gr22a	v109329
CG13788	Gr28b	v101727
CG18531	Gr2a	v39570
CG31620	Gr39b	v33215
CG1712	Gr43a	v107681
CG30186	Gr59c	v3530
CG33151	Gr59e	v103954
CG33151	Gr59e	v31110
CG33151	Gr59e	v31111
CG33150	Gr59f	v101709
CG32255	Gr64f	v100156
CG7189	Gr66a	v101237
CG33083	Gr97a	v104734
CG13976	Gr98a	v1300
CG31059	Gr98b	v101040
CG31059	Gr98b	v1302
CG32693	Gr9a	v102536
CG32693	Gr9a	v39239
CG32693	Gr9a	v39240
CG17161	grp	v12680
CG11338	gskt	v107429
CG6964	Gug	v107413
CG7719	gwl	BL34525
CG7719	gwl	BL35212
CG7719	gwl	v21046
CG33114	Gyc32E	v108142
CG42636	Gyc76C	v106525
CG4154	Gyc88E	v101672
CG14885	Gyc89Da	v105906
CG1912	Gycalpha99B	v107074
CG4395	hec	v7223
CG17090	Hipk	BL35363
CG17090	Hipk	v108254
CG17090	Hipk	v32855
CG5005	HLH54F	v103965
CG1594	hop	v102830
CG1594	hop	v40039
CG11228	hpo	BL27661
CG11228	hpo	BL35176
CG11228	hpo	v104169
CG11228	hpo	v7823
CG7097	hppy	v103580
CG7223	htl	BL35024
CG7223	htl	v27180
CG31795	IA-2	v7560
CG4201	IKKbeta	v26427
CG2615	IKKepsilon	v103748
CG6518	inaC	v101719
CG18402	InR	BL31037
CG18402	InR	BL31594
CG18402	InR	BL35251
CG18402	InR	v991/TM3,Sb
CG18402	InR	v992
CG4590	Inx2	v102194
CG1448	Inx3	BL30501
CG1448	Inx3	v108913
CG1448	Inx3	v39094
CG1448	Inx3	v44767
CG7537	Inx5	BL28042
CG7537	Inx5	v6950
CG17063	Inx6	v46398
CG17063	Inx6	v46399
CG17063	Inx6	v8638
CG2977	Inx7	v103256
CG2977	Inx7	v22948
CG2977	Inx7	v22949
CG4583	Ire1	BL35253
CG4583	Ire1	BL36743
CG4583	Ire1	v39561
CG6297	JIL-1	v107001
CG32397	jv	NIG8261R1
CG32397	jv	v103870
CG32397	jv	v106084
CG43323	Klp54D	v100140
CG17216	KP78b	v105265
CG2899	ksr	v45040
CG11440	laza	v42594
CG34411	Lgr4	v102681
CG12244	lic (MKK3)	BL31643
CG12244	lic (MKK3)	BL35154
CG12244	lic (MKK3)	BL53866
CG12244	lic (MKK3)	v106822	+
CG12244	lic (MKK3)	v20166	-
CG1848	LIMK1	v25343
CG9374	Lkb1	v108356
CG4677	lmd	v28376
CG4677	lmd	v28377
CG10895	lok	BL35152
CG10895	lok	v44980
CG3004	Lst8	v101373
CG4356	mAChR-A	v33123
CG7918	mAChR-B	v100217
CG12796	mAChR-C	v11464
CG1098	Madm	v101758
CG3086	MAPk-Ak2	v3170
CG3086	MAPk-Ak2	v3171
CG33106	mask	BL31574
CG33106	mask	BL34571	+
CG33106	mask	NIG6268R1
CG33106	mask	NIG6268R2
CG33106	mask	NIG6313R2	+
CG33106	mask	NIG6313R3
CG33106	mask	v33396
CG10379	mbc	NIG103791R1
CG10379	mbc	NIG103791R1/R3
CG10379	mbc	NIG103791R3	*
CG10379	mbc	v16044
CG8208	MBD-like	v107151
CG18582	mbt	v46043
CG4252	mei-41	v103624
CG7717	Mekk1	BL28587
CG7717	Mekk1	NIG7717R1	+
CG7717	Mekk1	NIG7717R2
CG7717	Mekk1	v25528
CG11221	meng	42948
CG31004	mesh	v108297
CG31004	mesh	v6867
CG10601	mirr	v22843
CG9738	Mkk4	NIG9738R1
CG9738	Mkk4	NIG9738R3
CG9738	Mkk4	v108561
CG14211	MKP-4	v3147
CG42273	mnb	v107066
CG13316	Mnt	v101991
CG4322	moody	v1800
CG9311	mop	v104860
CG8767	Mos	v36531
CG7643	Mps1	BL35283
CG32296	Mrtf	v34503
CG16973	msn	NIG16973R1
CG16973	msn	NIG16973R1/R2
CG13803	MsR2	v49952
CG13803	MsR2	v49953
CG2244	MTA1-like	v45734
CG3743	MTF-1	v107124
CG6936	mth	v102303
CG17061	mthl10	v51425
CG31147	mthl11	v5968
CG9115	mtm	v29032
CG3530	Mtmr6	v26216
CG30361	mtt	v1022982
CG32417	Myt1	v105157
CG3936	N	v27228
CG3936	N	v27229
CG10637	Nak	v35482
CG17256	Nek2	v103408
CG10951	niki	BL35735
CG10951	niki	v100823
CG16876	NimC4	v101915
CG16876	NimC4	v1030
CG5125	ninaC	BL27693
CG5125	ninaC	v27360
CG4550	ninaE	v44178
CG7892	nmo	v101545
CG32743	nonC	BL31094
CG32743	nonC	BL35349
CG32743	nonC	v108450
CG32743	nonC	v41988
CG3620	norpA	v105676
CG1147	NPFR	v9605
CG4007	Nrk	v103804
CG10198	Nup98-96	BL28562
CG3573	Ocrl	v34649
CG33976	Octbeta2R	v104524
CG42244	Octbeta3R	v106519
CG17867	Or10a	v7222
CG18859	Or19a	v49232
CG32825	Or19b	v49746
CG4231	Or22b	v51414
CG11767	Or24a	v100057
CG11767	Or24a	v9340
CG17250	Or42a	v100316
CG1854	Or43a	v110586
CG17853	Or43b	v7360
CG12931	Or45b	v9352
CG3569	Or59b	v107460
CG3569	Or59b	v43809
CG17226	Or59c	v33122
CG12526	Or67a	v100323
CG10759	Or7a	v107874
CG16755	Or85f	v7202
CG17241	Or94a	v47166
CG5540	Or98a	v1315
CG8967	otk	BL25790
CG8964	otk2	v106266
CG8964	otk2	v29908
CG8964	otk2	v3075
CG8964	otk2	v3076
CG17484	p120ctn	v103063
CG5475	p38a	BL27316
CG5475	p38a	BL34744
CG5475	p38a	BL35244
CG5475	p38a	v102484
CG5475	p38a	v34238
CG5475	p38a	v52278
CG7393	p38b	BL59005 (p38DN)	+
CG7393	p38b	NIG7393R3
CG7393	p38b	v108099
CG33338	p38c	v105173
CG10295	Pak	v108937
CG10295	Pak	v12553
CG14895	Pak3	v107260
CG8201	par-1	v52553
CG3105	Pask	v107025
CG3105	Pask	v25662
CG8808	Pdk	BL35142
CG8808	Pdk	v106641
CG8808	Pdk	v37968
CG1210	Pdk1	v18736
CG12151	Pdp	v31661
CG2087	PEK	v16427
CG7228	pes	v100391
CG9493	Pez	v108301
CG9493	Pez	v40743
CG10493	Phlpp	v45363
CG2699	Pi3K21B	v104179
CG5373	Pi3K59F	v100296
CG11621	Pi3K68D	BL31252
CG11621	Pi3K68D	BL35265
CG11621	Pi3K68D	v16240
CG4141	Pi3K92E	BL27690	+
CG4141	Pi3K92E	BL38985	*
CG4141	Pi3K92E	BL8288
CG4141	Pi3K92E	v107390
CG10260	Pi4KIIIalpha	v105614
CG10260	Pi4KIIIalpha	v15993
CG4523	Pink1	v21860
CG17471	PIP4K	BL35338
CG3682	PIP5K59B	v108104
CG4268	Pitslre	v107303
CG9918	PK1-R	v101115
CG5182	Pk34A	v101146
CG4379	Pka-C1	BL31277
CG4379	Pka-C1	BL31599
CG4379	Pka-C1	v101524
CG6117	Pka-C3	BL27569
CG42341	Pka-R1	v26329
CG1954	Pkc98E	v108151
CG10524	Pkcdelta	BL28355
CG10524	Pkcdelta	v101029
CG42349	Pkcdelta	v101421
CG42349	Pkcdelta	v22755
CG42349	Pkcdelta	v33837
CG7125	PKD	v106255
CG3324	Pkg21D	v103513
CG3324	Pkg21D	v34594
CG10118	ple	UAS-pleRNAi
CG11420	png	v31500
CG3978	pnr	v101522
CG3978	pnr	v6224
CG17077	pnt	v7171
CG12306	polo	v20177
CG9156	Pp1-13C	v107770
CG5650	Pp1-87B	v35025
CG6593	Pp1alpha-96A	v105525
CG9842	Pp2B-14D	v103144
CG2984	Pp2C1	v33599
CG32505	Pp4-19C	v25317
CG8402	PpD3	v107386
CG10138	PpD5	v104452
CG3245	PpN58A	v102060
CG12217	PpV	v31690
CG10930	PpY-55A	v102021
CG4993	PRL-1	v45518
CG1837	prtp	v106924
CG2368	psq	v30591
CG5671	Pten	v101475
CG1817	Ptp10D	v1104
CG1817	Ptp10D	v8010
CG6899	Ptp4E	v1012
CG18243	Ptp52F	v27725
CG18243	Ptp52F	v39175
CG9181	Ptp61F	v37436
CG10975	Ptp69D	v40631
CG10975	Ptp69D	v4789
CG11516	Ptp99A	v103457
CG1228	Ptpmeg	v103740
CG32697	Ptpmeg2	v104427
CG10371	PTPMT1	v30698
CG10371	PTPMT1	v47623
CG10371	PTPMT1	v47624
CG8222	Pvr	NIG8222R3	++
CG8222	Pvr	v105353	++
CG8222	Pvr	v13502	++
CG8222	Pvr	v43459	++
CG7660	Pxt	v14377
CG7660	Pxt	v14379
CG2248	Rac1	NIG2248R1
CG2248	Rac1	NIG2248R2
CG2248	Rac1	UAS-Rac1DN
CG8556	Rac2	v50349
CG8556	Rac2	v50350
CG2845	Raf	NIG2845R3
CG1799	ras	BL31653
CG1799	ras	BL31654
CG9375	Ras85D	BL29319	+
CG9375	Ras85D	BL34619	+
CG9375	Ras85D	BL35414	*
CG9375	Ras85D	NIG9375R1	++
CG9375	Ras85D	NIG9375R3	*
CG17766	Rbcn-3B	v14530
CG42667	rdgA	v102909
CG11992	Rel	v49414
CG5279	Rh5	v101930
CG5192	Rh6	v1836
CG5638	Rh7	v1748
CG8416	Rho1	UAS-Rho1DN
CG40494	RhoGAP1A	BL33390
CG40494	RhoGAP1A	v105202
CG40494	RhoGAP1A	v107581
CG12559	rl (Erk)	BL31387
CG12559	rl (Erk)	BL31524
CG12559	rl (Erk)	BL34855	+
CG12559	rl (Erk)	BL36058
CG9774	Rok	v104675
CG9774	Rok	v3793
CG9108	RSG7	v101733
CG4125	rst	v27223
CG10233	rtp	v10900
CG9533	rut	v101759
CG17596	S6kII	v101451
CG7001	S6KL	BL28757
CG7001	S6KL	BL35178
CG7001	S6KL	v101951
CG7001	S6KL	v102179
CG7186	SAK	v105102
CG4636	SCAR	NIG4636R1
CG4636	SCAR	v21908
CG3576	schlank	v41114
CG9495	Scm	v3795
CG1030	Scr	v3034
CG8544	sd	v101497
CG18085	sev	BL31274
CG18085	sev	BL31652
CG18085	sev	v49924
CG6114	sff	v100717
CG18247	Shark	v105706
CG4290	Sik2	v103739
CG1747	Sk1	v32932
CG32484	Sk2	v101018
CG9985	sktl	v101624
CG4200	sl	v7173
CG4200	sl	v7174
CG4527	Slik	v43783
CG4527	Slik	v43784
CG34380	smal	v39446
CG34380	smal	v39447
CG3956	sna	v50003
CG3956	sna	v50004
CG3956	sna	v6232
CG3090	Sox14	v107146
CG18024	SoxN	v41079
CG16752	SPR	v106801
CG1776	sqa	v101640
CG42347	sqa	v107241
CG42347	sqa	v44736
CG3595	sqh	v7916
CG3595	sqh	v7917
CG44128	Src42A	v100708
CG44128	Src42A	v26019
CG7524	Src64B	NIG7524R3
CG3992	srp	v109521
CG3992	srp	v35579
CG11489	Srpk79D	v102632
CG6993	ss	v10715
CG13591	Ssl	v108692
CG4257	Stat92E	BL26899
CG4257	Stat92E	BL31317
CG4257	Stat92E	BL31318
CG4257	Stat92E	BL33637	*
CG8304	Strn-Mlck	BL26736
CG8304	Strn-Mlck	BL31891
CG42345	stw	v100070
CG42345	stw	v101687
CG42345	stw	v22959
CG8409	Su(var)205	v107477
CG8013	Su(z)12	v42422
CG6562	Synj	v46070
CG14217	Tao	v107645
CG10673	Tcs5	v27301
CG6535	tefu	v108074
CG7525	Tie	v26879
CG7525	Tie	v27087
CG14026	tkv	v105834
CG34412	Tlk	v105732
CG5092	Tor	BL33951	+
CG5092	Tor	NIG5092R1	+
CG1389	tor	v4299
CG5408	trbl	v14797
CG8637	trc	v107923
CG3171	Tre1	v108952
CG3171	Tre1	v7219
CG3171	Tre1	v7220
CG18345	trpl	v104450
CG4965	twe	v46064
CG3172	twf	v25817
CG2956	twi	v37091
CG2956	twi	v37092
CG17131	tyn	v100426
CG16766	TyrRII	v51387
CG11012	Ugt37A1	v6398
CG18020	Unc-89	v106267
CG7893	Vav	BL39059	+
CG7893	Vav	v6241
CG7893	Vav	v6242
CG14029	vri	v5650
CG4488	Wee1	v106329
CG10776	wit	v42244
CG10776	wit	v865
CG7177	Wnk	v106928
CG12072	wts	BL27662
CG12072	wts	v106174
CG8804	wun	v51091
CG8805	wun2	v103452
CG10125	zpg	v33277
CG5847	zye	v3162

## Sheet: Gene ID
CG Number
CG10002
CG10016
CG10021
CG10033
CG10060
CG10089
CG10118
CG10125
CG10138
CG10177
CG10198
CG10233
CG10260
CG10260
CG10261
CG10278
CG1028
CG10295
CG1030
CG10371
CG10371
CG10376
CG10379
CG10393
CG10417
CG10493
CG10524
CG10545
CG1056
CG10564
CG10572
CG10579
CG10601
CG10637
CG10673
CG10697
CG10702
CG10738
CG10759
CG10763
CG10776
CG10776
CG10895
CG10895
CG10930
CG10951
CG10975
CG10975
CG1098
CG11012
CG1107
CG11221
CG11228
CG11228
CG11318
CG11325
CG11338
CG11420
CG11425
CG11426
CG11437
CG11440
CG1147
CG11489
CG11491
CG11516
CG11533
CG11533
CG11597
CG11621
CG11621
CG11767
CG11992
CG12069
CG12072
CG12073
CG1210
CG12147
CG12151
CG12217
CG12232
CG12235
CG12244
CG1227
CG1228
CG12290
CG12306
CG12526
CG12530
CG12559
CG12622
CG12746
CG12796
CG12931
CG13067
CG13197
CG13316
CG13412
CG13575
CG13579
CG13591
CG1362
CG13702
CG13788
CG13803
CG1389
CG13976
CG14026
CG14029
CG14030
CG14211
CG14217
CG14226
CG14297
CG1448
CG1455
CG14575
CG1479
CG1479
CG14885
CG14895
CG14992
CG15013
CG1506
CG1511
CG1511
CG15112
CG15113
CG15224
CG15528
CG15556
CG15744
CG15793
CG1587
CG1594
CG1609
CG1621
CG1658
CG16752
CG16755
CG16766
CG16876
CG16973
CG17026
CG17027
CG17028
CG17029
CG17061
CG17063
CG17077
CG17090
CG17090
CG1712
CG17131
CG17158
CG17161
CG17174
CG17174
CG17216
CG17226
CG17241
CG17250
CG17256
CG17348
CG17348
CG1747
CG17471
CG17484
CG17520
CG17528
CG17596
CG17598
CG1760
CG17678
CG1768
CG17698
CG17698
CG17746
CG17759
CG1776
CG17760
CG17766
CG17853
CG17867
CG17894
CG1799
CG17998
CG18020
CG18024
CG18085
CG18085
CG1817
CG1817
CG18243
CG18247
CG18314
CG18345
CG1837
CG18402
CG18402
CG1848
CG18531
CG1854
CG18582
CG18734
CG18741
CG18859
CG1886
CG1906
CG1912
CG1951
CG1954
CG2028
CG2048
CG2086
CG2087
CG2096
CG2125
CG2204
CG2244
CG2248
CG2368
CG2577
CG2615
CG2699
CG2835
CG2845
CG2899
CG2914
CG2956
CG2977
CG2984
CG3004
CG30054
CG30106
CG30186
CG30340
CG30361
CG30420
CG3051
CG3051
CG3068
CG3086
CG3090
CG31004
CG3105
CG3105
CG31059
CG31140
CG31147
CG31183
CG31190
CG3131
CG31431
CG31469
CG31605
CG31620
CG31662
CG3171
CG31714
CG3172
CG31750
CG31795
CG32019
CG32255
CG32296
CG32301
CG32305
CG32346
CG32397
CG32417
CG32447
CG3245
CG32484
CG32505
CG32540
CG32547
CG32664
CG32666
CG32693
CG32697
CG32703
CG32742
CG32743
CG3277
CG32825
CG32843
CG32944
CG33083
CG33106
CG33114
CG33150
CG33151
CG3324
CG33338
CG33344
CG33517
CG33543
CG33639
CG33958
CG33976
CG34356
CG34357
CG34361
CG34372
CG34380
CG34384
CG34411
CG34412
CG3525
CG3530
CG3569
CG3573
CG3576
CG3595
CG3618
CG3620
CG3632
CG3682
CG3694
CG3727
CG3743
CG3758
CG3829
CG3915
CG3936
CG3954
CG3956
CG3969
CG3978
CG3992
CG4006
CG4007
CG4012
CG40129
CG4032
CG4041
CG40494
CG4125
CG4141
CG4154
CG4168
CG4200
CG4201
CG42244
CG42273
CG42283
CG4231
CG42317
CG42327
CG42341
CG42345
CG42347
CG42349
CG42366
CG42450
CG4252
CG4257
CG42636
CG42667
CG4268
CG4290
CG4313
CG4322
CG43323
CG43373
CG4356
CG4379
CG4395
CG44128
CG4488
CG4523
CG4527
CG4550
CG4551
CG4583
CG4583
CG4590
CG4636
CG4677
CG4720
CG4838
CG4839
CG4965
CG4993
CG5005
CG5055
CG5092
CG5125
CG5169
CG5169
CG5182
CG5192
CG5206
CG5279
CG5336
CG5373
CG5408
CG5475
CG5475
CG5488
CG5540
CG5638
CG5650
CG5671
CG5680
CG5712
CG5790
CG5847
CG5952
CG5983
CG6027
CG6033
CG6036
CG6114
CG6117
CG6297
CG6338
CG6355
CG6386
CG6498
CG6518
CG6535
CG6562
CG6593
CG6667
CG6800
CG6805
CG6899
CG6936
CG6963
CG6963
CG6964
CG6993
CG7001
CG7097
CG7125
CG7156
CG7177
CG7186
CG7189
CG7223
CG7223
CG7228
CG7236
CG7378
CG7393
CG7393
CG7497
CG7524
CG7525
CG7525
CG7537
CG7643
CG7660
CG7672
CG7693
CG7717
CG7719
CG7838
CG7873
CG7892
CG7893
CG7918
CG7978
CG8013
CG8049
CG8127
CG8173
CG8201
CG8208
CG8222
CG8250
CG8250
CG8261
CG8285
CG8304
CG8304
CG8402
CG8409
CG8416
CG8485
CG8544
CG8556
CG8565
CG8637
CG8657
CG8667
CG8726
CG8767
CG8770
CG8804
CG8805
CG8808
CG8808
CG8866
CG8874
CG8874
CG8878
CG8914
CG8914
CG8933
CG8964
CG8967
CG9095
CG9108
CG9115
CG9156
CG9181
CG9210
CG9222
CG9311
CG9374
CG9375
CG9389
CG9391
CG9493
CG9493
CG9495
CG9533
CG9553
CG9652
CG9738
CG9774
CG9784
CG9842
CG9901
CG9918
CG9962
CG9985
